# Supplementary material for: Identifying priority conservation landscapes and actions for the Critically Endangered Javan leopard in Indonesia: Conserving the last large carnivore in Java Island
Source: PubMed Central journal article supplement (PMC6021038; doi:10.1371/journal.pone.0198369), 2018-06-27
Supplement: pone.0198369.s004.pdf [file pone.0198369.s004.pdf]

**S2 Table. List of predicted suitable landscapes and land use characteristics in each landscape.** Suitable landscapes were defined based on Maxent model outputs with logistic probabilities of 0.42 or greater.

| Landscape |                   |           | Protected Area*         |                |           | Land Use (ha)  |                |                  |                   |                   |            |            |       |        |
|-----------|-------------------|-----------|-------------------------|----------------|-----------|----------------|----------------|------------------|-------------------|-------------------|------------|------------|-------|--------|
| ID        | Name              | Area (ha) | Name                    | Status         | Area (ha) | Protected Area | Primary Forest | Secondary Forest | Mixed Agriculture | Production Forest | Rice Field | Plantation | Shrub | Others |
| 1         | Ujung Kulon       | 49,332    | Ujung Kulon             | National Park  | 46,964    | 46,241         | 79             | 150              | 1,098             | 256               | 1,217      | 88         | 107   | 97     |
| 2         | Rawa Danau        | 28,662    | Carita                  | Nature Park    | 95        | 6,739          | -              | 3,830            | 8,405             | 8,150             | 1,505      | 0          | 16    | 17     |
|           |                   |           | Rawa Danau              | Nature Reserve | 3,586     |                |                |                  |                   |                   |            |            |       |        |
|           |                   |           | Gunung Tukung Gede      | Nature Reserve | 1,540     |                |                |                  |                   |                   |            |            |       |        |
| 3         | Gunung Kencana    | 11,224    |                         |                |           | -              | -              | 943              | 7,940             | 536               | -          | 566        | 1,239 | -      |
| 4         | Halimun - Salak   | 168,723   | Gunung Halimun Salak    | National Park  | 75,537    | 74,923         | 762            | 22,746           | 43,286            | 10,593            | 9,740      | 3,606      | 2,660 | 407    |
| 5         | Cikepuh           | 8,783     | Cibanteng               | Nature Reserve | 468       | 8,613          | -              | -                | 146               | 9                 | 14         | -          | -     | 1      |
|           |                   |           | Cikepuh                 | Game Reserve   | 8,270     |                |                |                  |                   |                   |            |            |       |        |
| 6         | Gede - Pangrango  | 32,370    | Gunung Gede Pangrango   | National Park  | 24,614    | 25,029         | 59             | 585              | 4,958             | 1,025             | -          | 611        | 94    | 8      |
|           |                   |           | Jember                  | Nature Park    | 52        |                |                |                  |                   |                   |            |            |       |        |
|           |                   |           | Telaga Warna            | Nature Reserve | 296       |                |                |                  |                   |                   |            |            |       |        |
| 7         | Gunung Simpang    | 84,428    | Telaga Patengan         | Nature Reserve | 124       | 22,421         | 19             | 13,803           | 13,061            | 8,381             | 7,931      | 16,187     | 2,393 | 233    |
|           |                   |           | Cimanggu                | Nature Park    | 159       |                |                |                  |                   |                   |            |            |       |        |
|           |                   |           | Gunung Simpang          | Nature Reserve | 14,983    |                |                |                  |                   |                   |            |            |       |        |
|           |                   |           | Gunung Tilu             | Nature Reserve | 7,574     |                |                |                  |                   |                   |            |            |       |        |
|           |                   |           | Cigenteng Cipanyi       | Nature Reserve | 41        |                |                |                  |                   |                   |            |            |       |        |
|           |                   |           | Malabar                 | Nature Reserve | 29        |                |                |                  |                   |                   |            |            |       |        |
| 8         | Gunung Burangrang | 16,790    | Gunung Burangrang       | Nature Reserve | 3,270     | 5,287          | -              | 2,535            | 2,313             | 6,189             | 48         | 389        | 29    | -      |
|           |                   |           | Gunung Tangkuban Perahu | Nature Reserve | 1,220     |                |                |                  |                   |                   |            |            |       |        |
|           |                   |           | Tahura Ir. H. Juanda    | Forest Park    | 511       |                |                |                  |                   |                   |            |            |       |        |
| 9         | Gunung Papandayan | 81,422    | Gunung Papandayan       | Nature Reserve | 7,720     | 16,755         | 461            | 23,870           | 19,993            | 12,965            | 4,516      | 1,190      | 917   | 754    |
|           |                   |           | Kawah Kamojang          | Nature Reserve | 8,236     |                |                |                  |                   |                   |            |            |       |        |
|           |                   |           | Gunung Guntur           | Nature Park    | 268       |                |                |                  |                   |                   |            |            |       |        |
| 10        | Gunung Masigit    | 12,852    | Masigit Kareumbi        | Hunting Park   | 12,613    | 12,455         | 24             | 74               | 185               | 98                | -          | 2          | 13    | -      |
| 11        | Gunung Sawal      | 7,266     | Gunung Sawal            | Game Reserve   | 5,648     | 5,330          | 21             | -                | 650               | 1,198             | 17         | -          | 50    | -      |
| 12        | Cimanintin        | 16,383    |                         |                |           | -              | -              | 3,821            | 10,051            | 1,755             | 546        | 0          | 210   | -      |
| 13        | Gunung Ciremai    | 19,782    | Gunung Ciremai          | National Park  | 15,078    | 14,658         | -              | 25               | 3,804             | 811               | 412        | -          | 72    | 0      |
| 14        | Pasir Panjang     | 39,644    |                         |                |           | -              | -              | 14,510           | 14,687            | 9,468             | 458        | 44         | 461   | 16     |
| 15        | Nusakambangan     | 11,771    | Nusakambangan Barat     | Nature Reserve | 667       | 852            | -              | 6,772            | 2,041             | -                 | -          | -          | 286   | 1,821  |
|           |                   |           | Nusakambangan Timur     | Nature Reserve | 214       |                |                |                  |                   |                   |            |            |       |        |
|           |                   |           | Karang Bolong           | Nature Reserve | <1        |                |                |                  |                   |                   |            |            |       |        |
| 16        | Gunung Slamet     | 38,326    | Telaga Ranjeng          | Nature Reserve | 57        | 54             | 84             | 10,341           | 13,946            | 12,458            | 456        | -          | 584   | 404    |
| 17        | Panusupan         | 14,122    |                         |                |           | -              | -              | 1,259            | 4,899             | 7,916             | 50         | -          | -     | -      |
| 18        | Sindoro - Dieng   | 64,935    | Telogo Dringo           | Nature Reserve | 29        | 31             | -              | 16,447           | 9,659             | 37,608            | 904        | 120        | 166   | -      |
| 19        | Merapi - Merbabu  | 19,488    | Gunung Merbabu          | National Park  | 5,924     | 12,293         | -              | 241              | 2,646             | 4,028             | 126        | -          | -     | 154    |
|           |                   |           | Gunung Merapi           | National Park  | 6,728     |                |                |                  |                   |                   |            |            |       |        |
| 20        | Gunung Muria      | 13,236    |                         |                |           | -              | -              | 3,770            | 3,653             | 5,814             | -          | -          | -     | -      |

| Landscape |                          |           | Protected Area*                   |                |           | Land Use (ha)  |                |                  |                   |                   |            |            |        |        |
|-----------|--------------------------|-----------|-----------------------------------|----------------|-----------|----------------|----------------|------------------|-------------------|-------------------|------------|------------|--------|--------|
| ID        | Name                     | Area (ha) | Name                              | Status         | Area (ha) | Protected Area | Primary Forest | Secondary Forest | Mixed Agriculture | Production Forest | Padi Field | Plantation | Shrub  | Others |
| 21        | Grojogan Sewu            | 26,260    | Grojogan Sewu                     | Nature Park    | 63        | 311            | -              | 7,457            | 7,827             | 9,582             | 625        | 300        | 156    | -      |
|           |                          |           | KGPAA Mangkunegoro I - Ngargoyoso | Forest Park    | 254       |                |                |                  |                   |                   |            |            |        |        |
| 22        | Arjuno - Wilis           | 19,833    | Sigogor                           | Nature Reserve | 197       | 188            | -              | 5,892            | 4,515             | 8,786             | -          | -          | 309    | 142    |
| 23        | Raden Suryo              | 85,670    | Raden Soeryo                      | Forest Park    | 28,134    | 28,017         | 13,607         | 3,072            | 11,572            | 20,264            | 3,333      | 3,244      | 1,904  | 657    |
|           |                          |           | Tretes                            | Nature Park    | 19        |                |                |                  |                   |                   |            |            |        |        |
| 24        | Bromo - Tengger - Semeru | 87,920    | Bromo Tengger Semeru              | National Park  | 50,243    | 50,396         | 1,383          | 7,654            |                   | 10,983            | 2,793      | -          | 1,427  | 261    |
|           |                          |           |                                   |                |           |                |                |                  | 13,022            |                   |            |            |        |        |
| 25        | Dataran Tinggi Yang      | 55,530    | Dataran Tinggi Iyang              | Game Reserve   | 13,804    | 12,865         | 7,932          | 4,709            | 4,301             | 16,037            | 2,667      | 5,285      | 1,711  | 23     |
|           |                          |           | Sungai Kolbu Iyang Plateau        | Nature Reserve | 19        |                |                |                  |                   |                   |            |            |        |        |
| 26        | Meru Betiri              | 61,149    | Meru Betiri                       | National Park  | 53,758    | 52,756         | -              | 2,881            | 7                 | 393               | 6          | 2,252      | 2,856  | -      |
| 27        | Gunung Raung             | 10,236    | Curah Manis Sempolan I - VIII     | Nature Reserve | 18        | 17             | 810            | 908              | 76                | 4,542             | -          | 1,809      | 1,928  | 147    |
| 28        | Baluran                  | 29,847    | Baluran                           | National Park  | 30,183    | 29,804         | -              | 4                | -                 | 7                 | 30         | -          | 0      | 0      |
| 29        | Alas Purwo               | 43,879    | Alas Purwo                        | National Park  | 45,004    | 43,785         | 8              | -                | -                 | 1                 | -          | -          | 66     | 20     |
|           |                          | 1,159,864 |                                   |                |           | 469,821        | 25,248         | 158,299          | 208,739           | 199,854           | 37,393     | 35,694     | 19,654 | 5,161  |

\* Statistik Direktorat Jenderal KSDAE 2015. Jakarta, Indonesia.
